# Supplementary material for: Study on modification and electrochemical properties of COS 2 -based cathode materials
Source: Royal Society of Chemistry journal article supplement (doi:10.1039/d5ra01620g), 2025-01-01
Supplement: d5ra01620g1.pdf [file d5ra01620g1.pdf]

## Supplementary Information for

### Study on modification and electrochemical properties of COS<sub>2</sub>-based cathode materials

*Rongrui Xu<sup>a,1</sup>, Yicheng Wei<sup>a,1</sup>, Ling Ding<sup>a</sup>, Hongliang Li<sup>a</sup>, Yuezhen Hua<sup>a</sup>, Yong Cao<sup>\*a</sup>  
and Yanhua Cui<sup>\*a</sup>*

<sup>a</sup>Institute of Electronic Engineering, China Academy of Engineering Physics,  
Mianyang 621900, P.R.China

<sup>1</sup> These authors contributed equally to this work

\* corresponding author

Content

S1: SEM images of Al<sub>2</sub>O<sub>3</sub>@CoS<sub>2</sub>-8day.

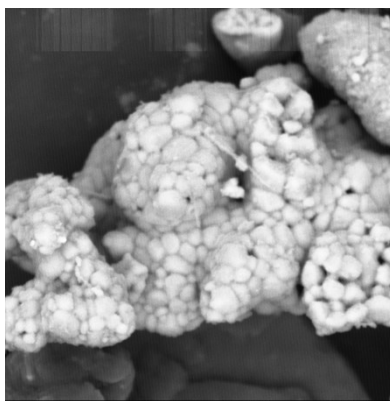

Fig.S1 SEM images of Al<sub>2</sub>O<sub>3</sub>@CoS<sub>2</sub>-8day.
